# Supplementary material for: Mechanism of FGF receptor dimerization and activation
Source: PubMed Central journal article supplement (PMC4725768; doi:10.1038/ncomms10262), 2016-01-04
Supplement: ncomms10262-s1.pdf [file ncomms10262-s1.pdf]

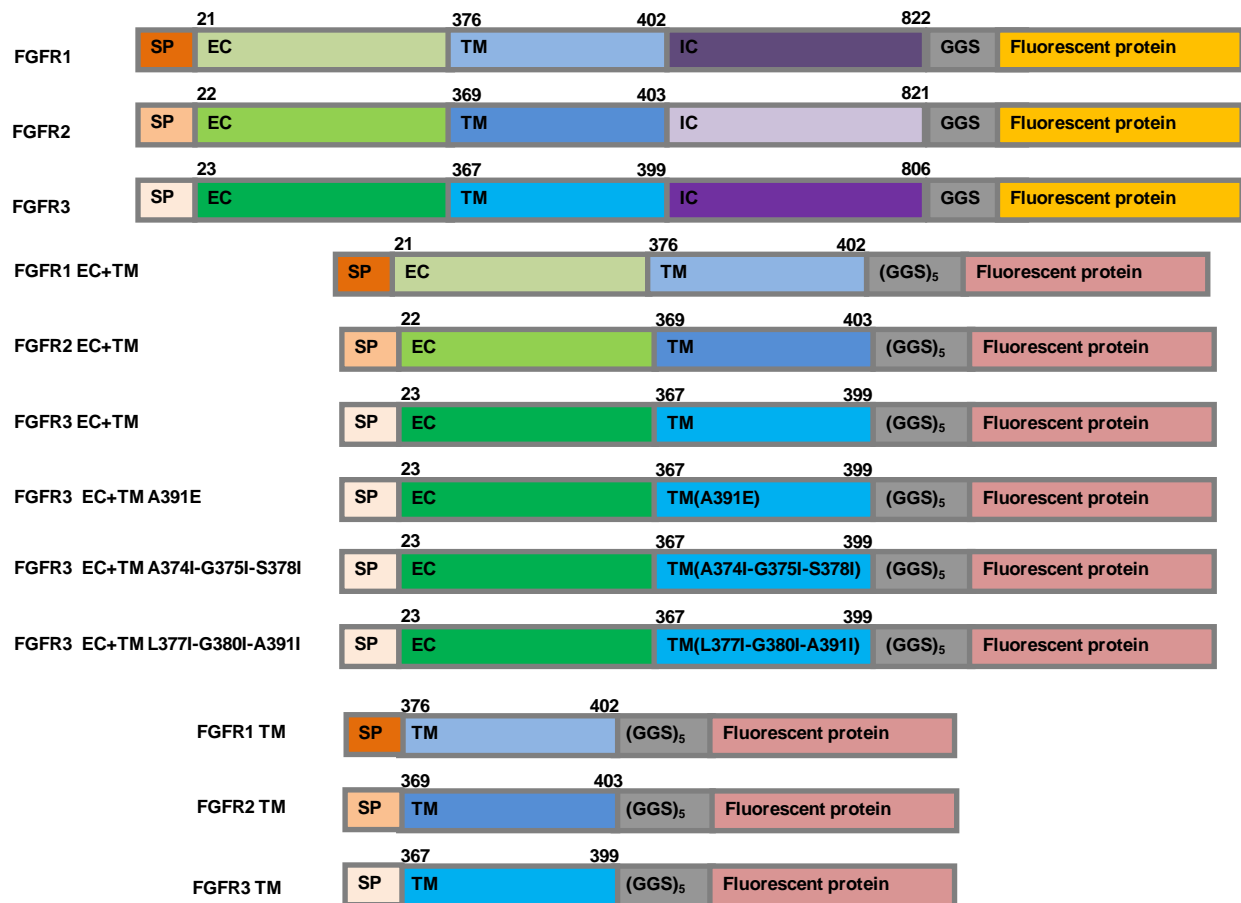

**Supplementary Figure 1. The plasmid constructs used in the FRET experiments.** SP: signal peptide, EC: extracellular domain, TM: transmembrane domain, IC: intracellular domain, FP: Fluorescent protein, either YFP or mCherry (a FRET pair). The full-length receptors had fluorescent proteins attached to their C-termini via a flexible GGS linker. The truncated receptors had the intracellular domain substituted with a fluorescent protein, which was attached to the TM domain via a longer flexible (GGS)<sub>5</sub> linker.

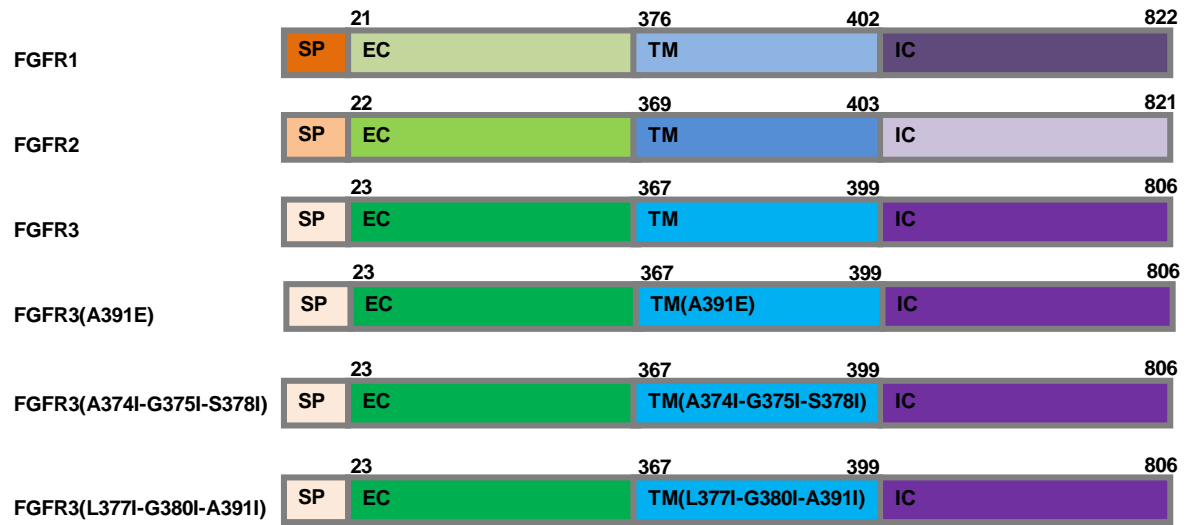

**Supplementary Figure 2. The plasmid constructs used in the Western blot experiments.**

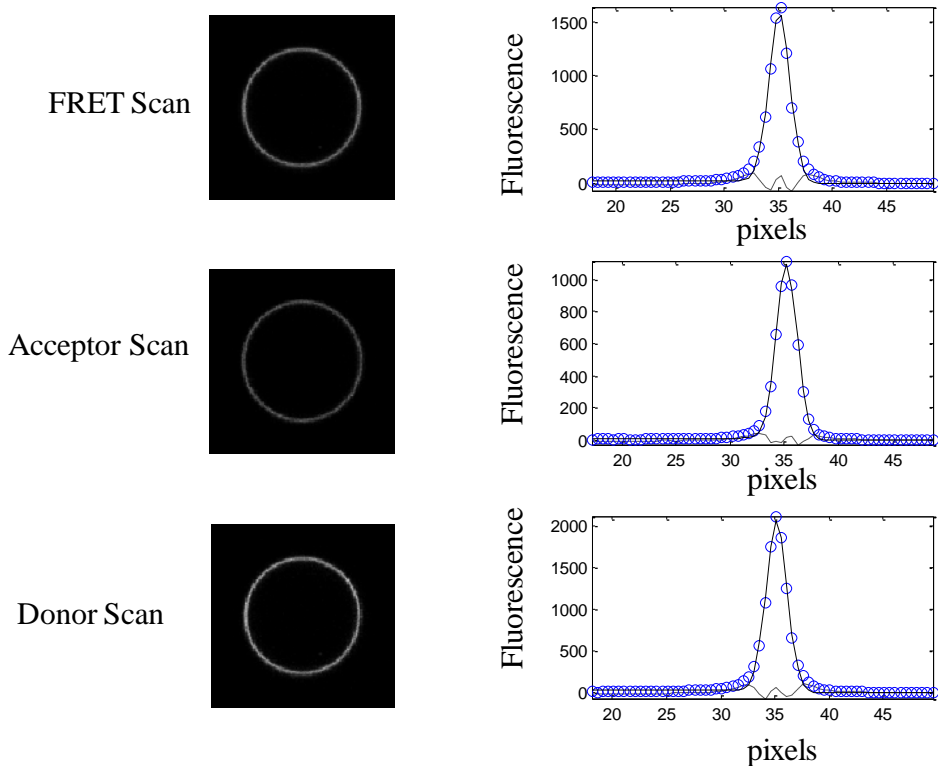

**Supplementary Figure 3. One vesicle imaged in three channels.** The vesicle co-expresses EC+TM FGFR2-YFP and EC+TM FGFR2-mCherry, and is imaged in the FRET, acceptor, and donor channels. A Gaussian function (black line) was fitted to the fluorescence intensity across the membrane (blue symbols) after correcting for background fluorescence. The residuals from the fits are shown with the dashed lines.

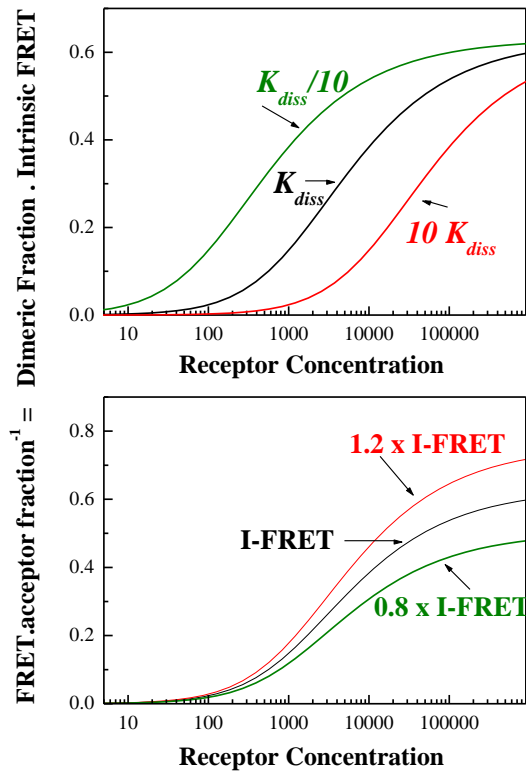

**Supplementary Figure 4. The effect of  $K_{diss}$  and Intrinsic FRET.** A visual demonstration of how the two unknown parameters, the dissociation constant  $K_{diss}$  and the Intrinsic FRET  $\tilde{E}$  affect the measured FRET. acceptor fraction<sup>-1</sup>.

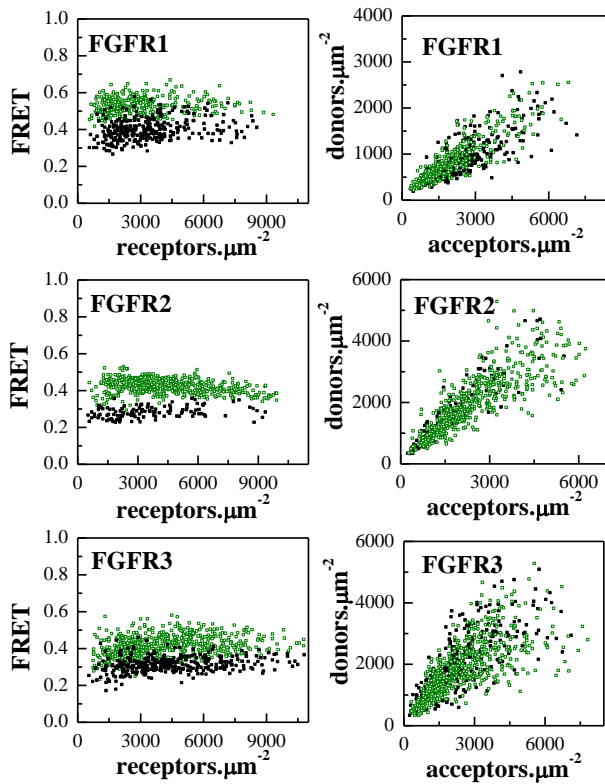

**Supplementary Figure 5. Effect of ligands on QI-FRET parameters.** FRET efficiencies, donor concentrations and acceptor concentrations, are measured for the wild-type EC+TM FGF receptors, in the presence of  $5 \mu\text{g}\cdot\text{ml}^{-1}$  fgf1 (black) or fgf2 (olive). Each data point represents a single vesicle. For each receptor/ligand pair, 300 to 500 individual plasma membrane-derived vesicles were imaged one hour after adding the ligand. FRET does not depend on the receptor concentration, as expected in the case of saturating ligand concentrations. The Intrinsic FRET for each vesicle was determined according to equation (11).

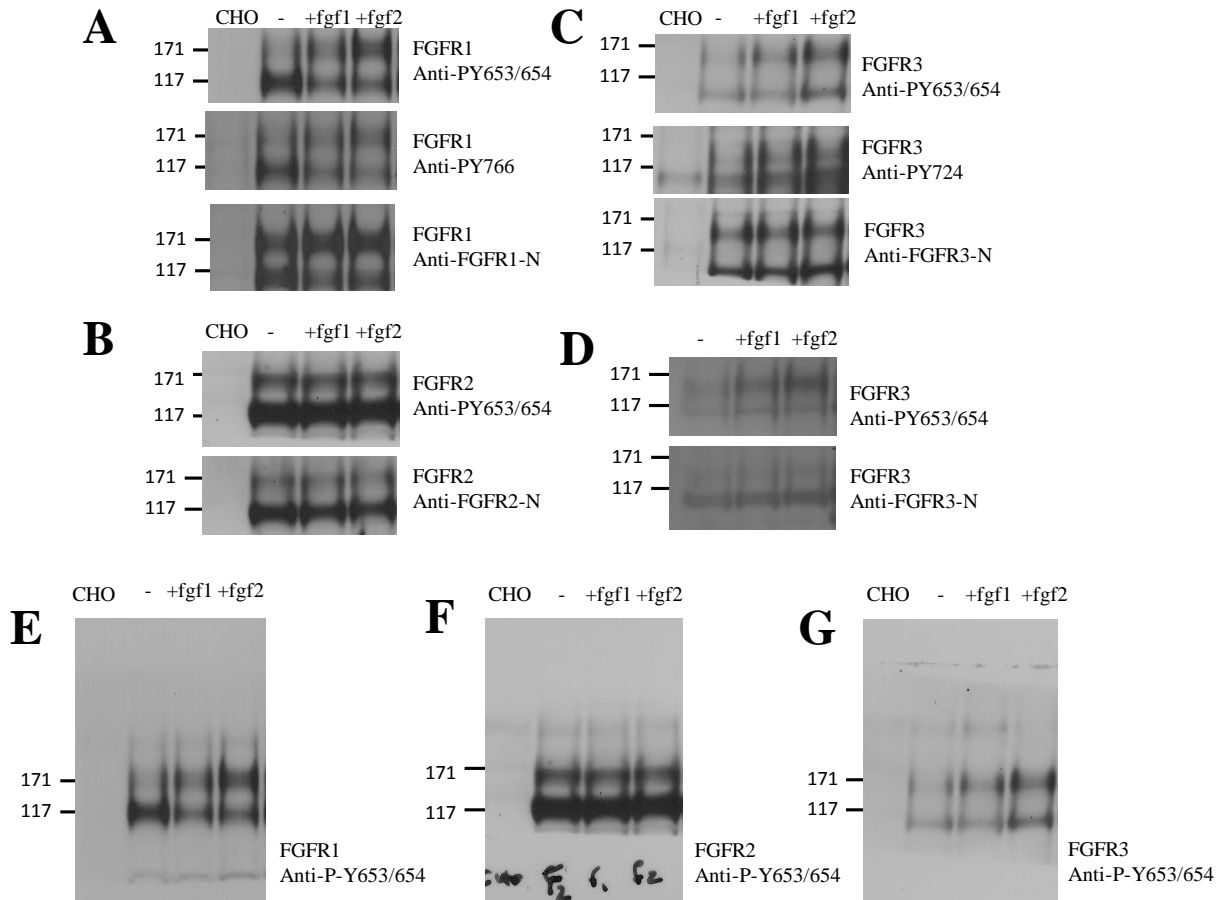

**Supplementary Figure 6. FGFR phosphorylation.** Phosphorylation of FGFR1, FGFR2, and FGFR3, characterized via Western blotting. Lane “CHO”: no transfection; Lane “-”: no ligand; Lane “fgf1”: +5  $\mu\text{g}\cdot\text{ml}^{-1}$  fgf1; Lane “fgf2”: +5  $\mu\text{g}\cdot\text{ml}^{-1}$  fgf2. (A): CHO cells transfected with wild-type FGFR1. (B): CHO cells transfected with wild-type FGFR2. (C): CHO cells transfected with wild-type FGFR3. (D): HEK 293T cells transfected with wild-type FGFR3. (E) Uncropped gel from A, top and Figure 3B, left. (F) Uncropped gel from B, top and Figure 3B, center. (G) Uncropped gel from C, top and Figure 3B, right.

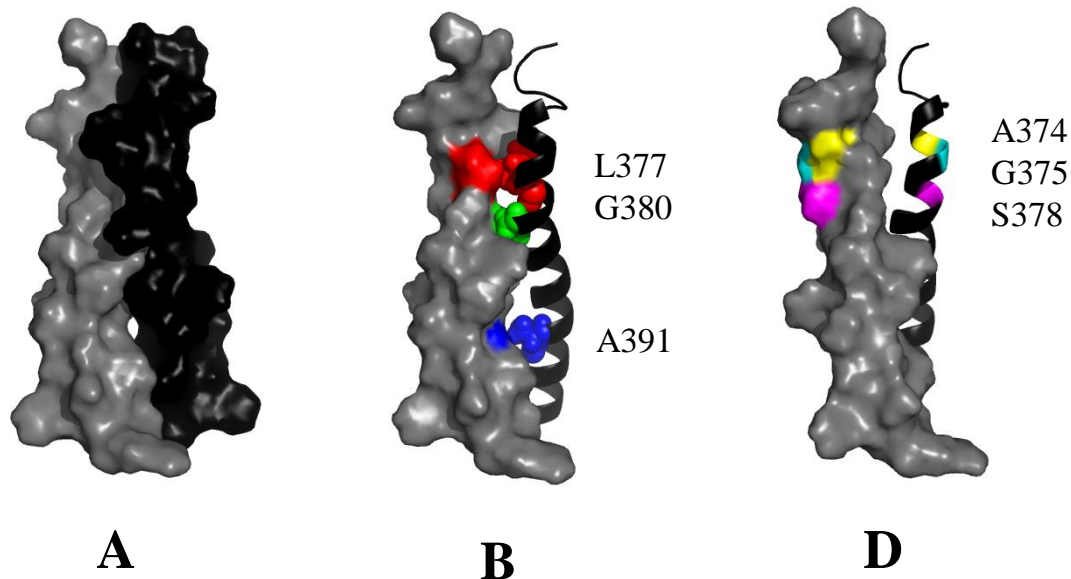

**C:** DEAGSVY<sup>374,5</sup>AGIL<sub>378</sub>SYGVGFLLFILVVAAVTLCRLR

**Supplementary Figure 7. FGFR3 TM domain structure in micelles.** (A) The dimer structure, solved by NMR<sup>1</sup>, is tightly packed. (B) Amino acids L377, G380, and A391 mediate helix-helix contacts in the structure, based on inter-helical NOEs that were measured experimentally. We mutated these three amino acids to Ile in order to disrupt this “NMR interface”. (C) Amino acids A374, G375 and S378 participate in several GxxxG-like motifs (also known as SMALLxxxSMALL motifs), known to mediate TM helix dimerization<sup>1</sup>. These GxxxG motifs have been proposed to stabilize a putative alternative FGFR3 TM dimer structure<sup>1</sup>. A374, G375 and S378 were mutated to Ile in our studies in order to disrupt this putative alternative dimer interface. (D) Amino acids A374, G375 and S378 face away from the dimer interface in the NMR structure.

**377I-380I-391I**

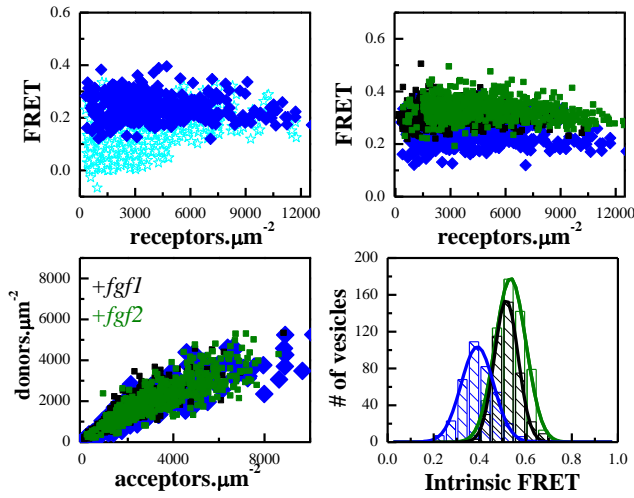

**Supplementary Figure 8. FRET data for the EC+TM FGFR3 L377I-G380I-A391I mutant.** Cyan: wild-type, no ligand. Blue: mutant, no ligand. Black: mutant + fgf1. Olive: mutant + fgf2.

**374I-375I-378I**

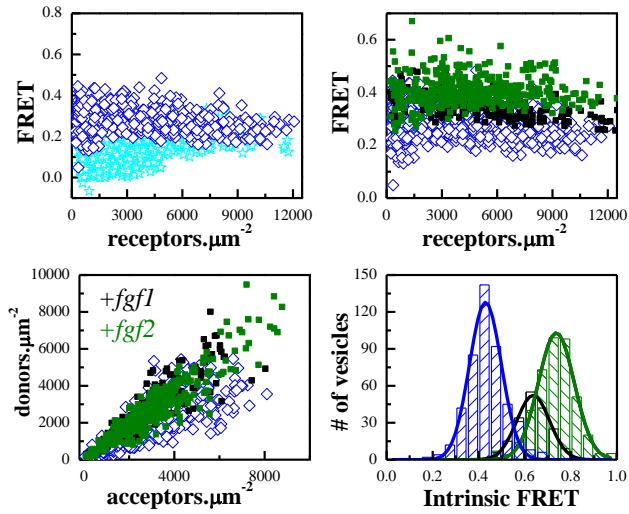

**Supplementary Figure 9. FRET data for the EC+TM FGFR3 A374I-G375I-S378I mutant.** Cyan: wild-type, no ligand. Blue: mutant, no ligand. Black: mutant + fgf1. Olive: mutant + fgf2.



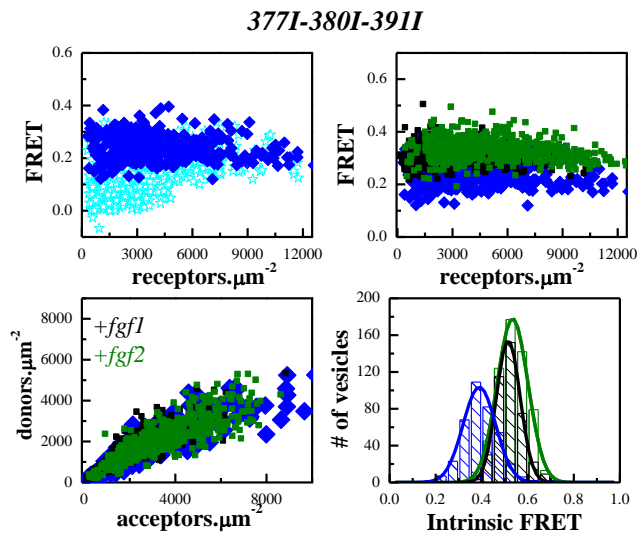

**Supplementary Figure 10. FRET data for the EC+TM A391E FGFR3 mutant.** The A391E mutation is the genetic cause for Crouzon syndrome with acanthosis nigricans. Magenta: wild-type, no ligand. Blue: mutant, no ligand. Black: mutant + fgf1. Olive: mutant + fgf2. Data in the absence of ligand are from <sup>2</sup>.

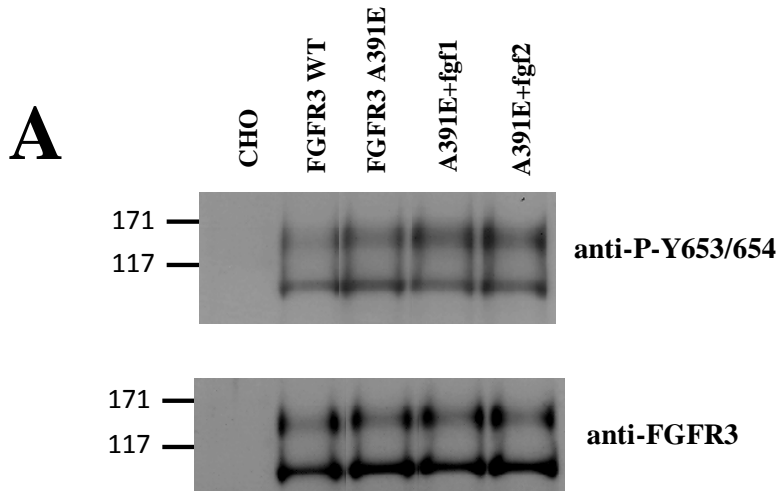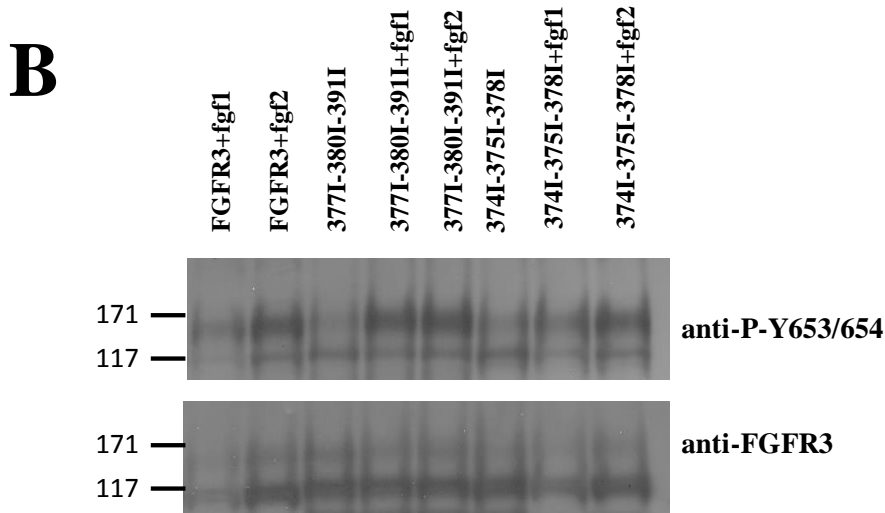

**Supplementary Figure 11. Supplementary Western blots.** (A) Western blot results for the A391E mutant. (B) Example Western blot, used to obtain the correlation in Figure 7. Phosphorylation was quantified as the ratio of the anti-phospho band intensity and the anti-FGFR3 band intensity. Only the top bands, corresponding to mature fully glycosylated FGFR3, were quantified.

| Primer name                            | 5'- 3' sequence                                                                                   |
|----------------------------------------|---------------------------------------------------------------------------------------------------|
| FGFR1 FW                               | GCC AAG CTT GCC GCC ATG TGG AGC TGG AAG TGC CTC                                                   |
| FGFR1 RV                               | GCC CTC GAG GCG GCG TTT GAG TCC GCC                                                               |
| FGFR2 FW                               | GCC AAG CTT GCC GCC ATG GTC AGC TGG GGT CGT TTC                                                   |
| FGFR2 RV                               | GCC GCC CTC GAG TGT TTT AAC ACT GCC GTT TAT GTG TGG                                               |
| FGFR3 FW                               | GCC AAG CTT GCC ACC ATG GGC GCC CCT GCC                                                           |
| FGFR3 RV                               | GGC GGC GAT ATC CGT CCG CGA GCC CCC                                                               |
| -(GGS)-FP FW                           | GCC CTC GAG GGT GGT TCA GTG AGC AAG GGC GAG GAG<br>GAT                                            |
| -(GGS)-FP RV                           | GGC GGC GGC TCT AGA TTA CTT GTA CAG CTC GTC CAT GCC                                               |
| EC+TM FGFR1 FW                         | GCC AAG CTT GCC GCC ATG TGG AGC TGG AAG TGC CTC                                                   |
| EC+TM FGFR1 RV                         | GGC GGC GGC GAA TTC ACC ACT CTT CAT CTT GTA GAC GAT<br>GAC                                        |
| EC+TM FGFR2 FW                         | GCC AAG CTT GCC GCC ATG GTC AGC TGG GGT CGT TTC                                                   |
| EC+TM FGFR2 RV                         | GGC GGC GGC GAA TTC CGT GTT CTT CAT TCG GCA CAG GAT<br>GAC                                        |
| EC+TM FGFR3 FW                         | GCC AAG CTT GCC ACC ATG GGC GCC CCT GCC                                                           |
| EC+TM FGFR3 RV                         | GGC GGC GAA TTC GCG CAG GCG GCA GAG                                                               |
| TM FGFR1 FW                            | GCC GCC GGT ACC GTT GAC CGT TCT GGA AGC CCT GGA<br>AGA GAG                                        |
| TM FGFR1 RV                            | GGC GGC GGC GAA TTC ACC ACT CTT CAT CTT GTA GAC GAT<br>GAC                                        |
| TM FGFR2 FW                            | GGC GCC GGT ACC CCT GGA AGA GAA AAG GAG ATT ACA<br>GCT TC                                         |
| TM FGFR2 RV                            | GGC GGC GGC GAA TTC CGT GTT CTT CAT TCG GCA CAG GAT<br>GAC                                        |
| TM FGFR3 FW                            | GCC CGT ACG GAC GAG GCG GGC AGT GTG                                                               |
| TM FGFR3 RV                            | GGC GGC GAA TTC GCG CAG GCG GCA GAG                                                               |
| -(GGS) <sub>5</sub> oligonucleotide FW | <u>GAA TTC</u> G GGA GGA AGT GGC GGA AGT GGC GGA AGT GGC<br>GGA AGT GGA GGA AGT GG <u>ACC GGT</u> |
| -(GGS) <sub>5</sub> oligonucleotide RV | <u>ACC GGT</u> CC ACT TCC TCC ACT TCC GCC ACT TCC GCC ACT<br>TCC GCC ACT TCC TCC C <u>GAA TTC</u> |
| A391E mutagenesis FW                   | CTG TTC ATC CTG GTG GTG GAA GCT GTG ACG CTC TGC CGC<br>CTG                                        |
| A391E mutagenesis RV                   | CAG GCG GCA GAG CGT CAC AGC TTC CAC CAC CAG GAT<br>GAA CAG                                        |
| A374I mutagenesis FW                   | GAG GCG GGC AGT GTG TAT ATA GGC ATC CTC AGC TAC<br>GGG                                            |
| A374I mutagenesis RV                   | CCC GTA GCT GAG GAT GCC TAT ATA CAC ACT GCC CGC CTC                                               |

|                             |                                                              |
|-----------------------------|--------------------------------------------------------------|
| G375I mutagenesis FW        | GCG GGC AGT GTG TAT GCA ATC ATC CTC AGC TAC GGG              |
| G375I mutagenesis RV        | CCC GTA GCT GAG GAT GAT TGC ATA CAC ACT GCC CGC              |
| S378I mutagenesis FW        | G TAT GCA GGC ATC CTC ATC TAC GGG GTG GGC TTC                |
| S378I mutagenesis RV        | GAA GCC CAC CCC GTA GAT GAG GAT GCC TGC ATA C                |
| L377I mutagenesis FW        | GTG TAT GCA GGC ATC ATC AGC TAC ATC GTG GGC                  |
| L377I mutagenesis RV        | GCC CAC GAT GTA GCT GAT GAT GCC TGC ATA CAC                  |
| G380I mutagenesis FW        | C GGC ATC CTC AGC TAC ATC GTG GGC TTC TTC CTG TTC<br>ATC CTG |
| G380I mutagenesis RV        | CAG GAT GAA CAG GAA GAA GCC CAC GAT GTA GCT GAG<br>GAT GCC G |
| A391I mutagenesis FW        | CTG TTC ATC CTG GTG GTG ATC GCT GTG ACG CTC TGC CGC<br>CTG   |
| A391I mutagenesis RV        | CAG GCG GCA GAG CGT CAC AGC GAT CAC CAC CAG GAT<br>GAA CAG   |
| A206K mutagenesis in YFP FW | CTG AGC TAC CAG TCC AAA CTG AGC AAA GAC CCC                  |
| A206K mutagenesis in YFP RV | GGG GTC TTT GCT CAG TTT GGA CTG GTA GCT CAG                  |

**Supplementary Table 1. Primers used in the study.**

#### Supplementary References

1. Bocharov, E.V. *et al.* Structure of FGFR3 Transmembrane Domain Dimer: Implications for Signaling and Human Pathologies. *Structure* **21**, 2087-2093 (2013).
2. Sarabipour, S. & Hristova, K. FGFR3 Unliganded Dimer Stabilization by the Juxtamembrane Domain. *J. Mol. Biol.* **427**, 1705-1714 (2015).
